# Supplementary material for: Review on the theory of moving reaction boundary, electromigration reaction methods and applications in isoelectric focusing and sample pre-concentration
Source: Royal Society of Chemistry journal article supplement (doi:10.1039/b807450j), 2008-01-01
Supplement: b807450j.pdf [file b807450j.pdf]

# **Review on Theory of Moving Reaction Boundary, Electromigration Reaction Methods and Applications in Isoelectric Focusing and Sample Pre-concentration**

**Cheng-Xi Cao\*<sup>1</sup>, Liu-Yin Fan<sup>1</sup> and Wei Zhang<sup>1</sup>**

*<sup>1</sup>Laboratory of Analytical Biochemistry & Bio-separation, Key Laboratory of Microbiology of Educational Ministry, School of Life Science and Biotechnology, Shanghai Jiao Tong University, Shanghai 200240, China*

---

\* The correspondence author: Professor Cheng-Xi Cao, School of Life Science and Biotechnology, Shanghai Jiao Tong University, 800 Dongchuan Rd., Shanghai 200240, P. R. China. email: [cxcao@sjtu.edu.cn](mailto:cxcao@sjtu.edu.cn), Fax: 86-21-3420 5820, phone: 86-21-3420 5682

**Table S1.** Agreements between prediction of  $R_f$  values and experiments on pH gradient drifting for different acid-base pairs in IEF in refs.<sup>a)</sup>

| No. | Run of IEF                     | Acid_base pairs                                             | $R_f$                 | Prediction <sup>b)</sup> | Experiment <sup>b)</sup> |
|-----|--------------------------------|-------------------------------------------------------------|-----------------------|--------------------------|--------------------------|
| 1   | Fig. 4 and 5 in Ref. [57]      | 0.2% H <sub>2</sub> SO <sub>4</sub><br>0.4% Ethylenediamine | 0.03                  | + → -, w                 | + → - w                  |
| 2   | Fig. 1 and 3 in Ref. [60]      | 100 mM H <sub>2</sub> SO <sub>4</sub><br>200 mM KOH         | 0.22                  | + → -, o                 | + → - o                  |
| 3   | Fig. 1 in Ref. [62]            | 100 mM H <sub>2</sub> SO <sub>4</sub><br>200 mM KOH         | 0.22                  | + → -, o                 | + → -, o                 |
| 4   | Fig. 1, 3D and 4B in Ref. [64] | 100 mM H <sub>2</sub> SO <sub>4</sub><br>200 mM KOH         | 0.22                  | + → -, o                 | + → -, o                 |
| 5   | Fig. 1B in Ref. [65]           | 100 mM H <sub>2</sub> SO <sub>4</sub><br>200 mM KOH         | 0.22                  | + → -, o                 | + → -, o                 |
| 6   | Fig. 3 and 4 in Ref. [67]      | 100 mM H <sub>2</sub> SO <sub>4</sub><br>200 mM KOH         | 0.22                  | + → -, o                 | + → -, o                 |
| 7   | Fig. 1A, 1B & 7 in Ref. [68]   | 10 mM Glycine<br>10 mM Arginine                             | -0.27                 | + ← -, o                 | + ← -, o                 |
| 8   | Fig. 2 in Ref. [68]            | 10 mM Glycine<br>10 mM Lysine                               | 1.91                  | + → -, o                 | + → -, o                 |
| 9   | Fig. 1, 2 and 3 in Ref. [59]   | 4.25% Phosphoric acid<br>5.0% Ethylenediamine               | 0.02                  | + → -, w                 | + → -, w                 |
| 10  | Fig. 1 in Ref. [63]            | 10 mM Aspartic acid<br>10 mM Lysine                         | 2.35                  | + → -, o                 | + → -, o                 |
| 11  | Fig. 2, 3A, 3C in Ref. [64]    | 10 mM MES<br>10 mM GABA                                     | 1.58×10 <sup>8</sup>  | + → -, s                 | + → -,s                  |
| 12  | Fig. 3B in Ref. [64]           | 750 mM MES<br>750 mM GABA                                   | 1.37×10 <sup>10</sup> | + → -, s                 | + → -, s                 |
| 13  | Fig. 1A, 2A in Ref. [65]       | 10 mM Aspartic acid<br>10 mM Histidine                      | 116                   | + → -, s                 | + → -, s                 |
| 14  | Fig 5 in Ref. [65]             | 10 mM Acetic acid<br>10 mM Tris                             | 0.02                  | + → -, w                 | + → -, w                 |
| 15  | Fig. 6 in Ref. [66]            | 40 mM Glutamic acid<br>40 mM Histidine                      | 270                   | + → -, s                 | + → -, s                 |
| 16  | Fig. 3 in Ref. [66]            | 10 mM Threonine<br>10 mM Lysine                             | 2.36                  | + → -, o                 | + → -, o                 |
| 17  | Fig. 1 in Ref. [66]            | 10 mM Threonine<br>10 mM Histidine                          | 116                   | + → -, s                 | + → -, s                 |
| 18  | Fig. 2 in Ref. [66]            | 10 mM Glycine<br>10 mM Histidine                            | 100                   | + → -, s                 | + → -, s                 |
| 19  | Fig. 4 in Ref. [66]            | 10 mM Glutamic acid<br>10 mM Histidine                      | 121                   | + → -, s                 | + → -, s                 |

|    |                             |                                                               |       |          |          |
|----|-----------------------------|---------------------------------------------------------------|-------|----------|----------|
| 20 | Fig. 2 in Ref. [71]         | 100 mM acetic acid<br>100 mM Tris                             | 0.01  | + → -, w | + → -, w |
| 21 | Fig. 1A, 1B in<br>Ref. [58] | 0.02% H <sub>2</sub> SO <sub>4</sub><br>0.40% Ethylenediamine | -0.02 | + ← -, w | + → -, w |

a) The computation of R<sub>r</sub> value is the same as those in Table 3.

b) “+ ← -” means the anodic drifting of pH gradient; “+ → -” implies the cathodic drifting of pH gradient; w = weak; o = obvious; s = strong.

**Table S2.** Agreements between the predictions of  $R_r$  values and the experiments of Hjerten's mobilization of pH gradient induced by adding salt after IEF in references.<sup>a)</sup>

| No. | IEF run                       | Acid_base pairs                                                                      | $R_r$                   | Prediction | Experiment |
|-----|-------------------------------|--------------------------------------------------------------------------------------|-------------------------|------------|------------|
| 1   | Table 1 in Ref. [80]          | 20 mM NaOH<br>20 mM NaOH                                                             | $-1.583 \times 10^{10}$ | Anodic     | Anodic     |
| 2   | Table 1 in Ref. [80]          | 20 mM H <sub>3</sub> PO <sub>4</sub> +80 mM NaCl<br>20 mM NaOH                       | -2.110                  | Anodic     | Anodic     |
| 3   | Table 1 in Ref. [80]          | 20 mM pH 3.6 Na <sub>3</sub> PO <sub>4</sub><br>20 mM NaOH                           | -34.36                  | Anodic     | Anodic     |
| 4   | Table 1 in Ref. [80]          | 20 mM pH 6.8 Na <sub>3</sub> PO <sub>4</sub><br>20 mM NaOH                           | $-6.03 \times 10^4$     | Anodic     | Anodic     |
| 5   | Table 1 in Ref. [80]          | 20 mM pH 11.5 Na <sub>3</sub> PO <sub>4</sub><br>20 mM NaOH                          | $-3.55 \times 10^9$     | Anodic     | Anodic     |
| 6   | Table 1 in Ref. [80]          | 20 mM pH 7.0 EA <sup>b)</sup> -H <sub>3</sub> PO <sub>4</sub><br>20 mM NaOH          | $-3.17 \times 10^4$     | Anodic     | Anodic     |
| 7   | Table 1 in Ref. [80]          | 20 mM pH 11 EA <sup>a)</sup><br>20 mM NaOH                                           | $-4.92 \times 10^7$     | Anodic     | Anodic     |
| 8   | Table 1 in Ref. [80]          | 20 mM pH 6.8 Na <sub>3</sub> PO <sub>4</sub><br>20 mM pH 9.0 Gly-NaOH                | $-6.77 \times 10^2$     | Anodic     | Anodic     |
| 9   | Table 1 in Ref. [80]          | 20 mM NaCl<br>20 mM pH 9.0 Gly-NaOH                                                  | $-5.22 \times 10^2$     | Anodic     | Anodic     |
| 10  | Table 1 in Ref. [80]          | 20 mM H <sub>3</sub> PO <sub>4</sub><br>20 mM H <sub>3</sub> PO <sub>4</sub>         | $1.33 \times 10^{10}$   | Cathodic   | Cathodic   |
| 11  | Table 1 in Ref. [80]          | 20 mM H <sub>3</sub> PO <sub>4</sub><br>100 mM NaCl                                  | $5.66 \times 10^5$      | Cathodic   | Cathodic   |
| 12  | Table 1 in Ref. [80]          | 20 mM H <sub>3</sub> PO <sub>4</sub><br>20 mM pH 6.8 Na <sub>3</sub> PO <sub>4</sub> | $3.52 \times 10^5$      | Cathodic   | Cathodic   |
| 13  | Table 1 in Ref. [80]          | 20 mM H <sub>3</sub> PO <sub>4</sub><br>20 mM NaOH+20 mM NaCl                        | 0.932                   | Cathodic   | Cathodic   |
| 14  | Table 1 in Ref. [80]          | 20 mM H <sub>3</sub> PO <sub>4</sub><br>20 mM NaOH+40 mM NaCl                        | 1.702                   | Cathodic   | Cathodic   |
| 15  | Table 1 in Ref. [80]          | 20 mM H <sub>3</sub> PO <sub>4</sub><br>20 mM NaOH+80 mM NaCl                        | 3.373                   | Cathodic   | Cathodic   |
| 16  | Fig. 2a, 3 and 4 in Ref. [78] | 20 mM NaOH<br>20 mM NaOH                                                             | $-1.583 \times 10^{10}$ | Anodic     | Anodic     |
| 17  | Fig. 2b in Ref. [78]          | 20 mM H <sub>3</sub> PO <sub>4</sub><br>20 mM H <sub>3</sub> PO <sub>4</sub>         | $1.33 \times 10^{10}$   | Cathodic   | Cathodic   |
| 18  | Fig. 1, 3 and 5 in Ref. [82]  | 20 mM NaOH<br>20 mM NaOH                                                             | $-1.58 \times 10^{10}$  | Anodic     | Anodic     |

|    |                              |                                                                                            |                       |          |                        |
|----|------------------------------|--------------------------------------------------------------------------------------------|-----------------------|----------|------------------------|
| 19 | Fig. 4 in Ref. [82]          | 20 mM H <sub>3</sub> PO <sub>4</sub><br>20 mM H <sub>3</sub> PO <sub>4</sub>               | 1.33×10 <sup>10</sup> | Cathodic | Cathodic               |
| 20 | Fig. 9 in Ref. [81]          | 20 mM H <sub>3</sub> PO <sub>4</sub><br>10 mM Glycine                                      | 123.7                 | Cathodic | Cathodic               |
| 21 | Fig.1,2,4B,5B,6B in ref. 87  | 10 mM H <sub>3</sub> PO <sub>4</sub><br>10 mM acetic acid                                  | 2.92×10 <sup>7</sup>  | Cathodic | Cathodic               |
| 22 | Fig. 1A in Ref. [88]         | 200 mM acetic acid<br>2000 mM ammonium acetate                                             | 1.31×10 <sup>7</sup>  | Cathodic | Cathodic               |
| 23 | Fig.2,4 in Ref. [89]         | 100 mM H <sub>3</sub> PO <sub>4</sub><br>40 mM NaOH + 80 mM NaCl                           | 1.81                  | Cathodic | Cathodic               |
| 24 | Fig. 1 - 5 in Ref. [92]      | 91 mM H <sub>3</sub> PO <sub>4</sub><br>20 mM pH 11.85 NaOH-H <sub>3</sub> PO <sub>4</sub> | 0.841                 | Cathodic | Cathodic               |
| 25 | Fig. 5,11,12,14 in ref. [90] | 100 mM H <sub>3</sub> PO <sub>4</sub><br>20 mM NaOH + 20 mM NaCl                           | 0.844                 | Cathodic | Cathodic               |
| 26 | Fig. 9 in ref. [91]          | 10 mM H <sub>3</sub> PO <sub>4</sub><br>20 mM NaOH+5 mM formic acid                        | 0.407                 | Cathodic | Cathodic               |
| 27 | Fig. 9 in Ref. [91]          | 10 mM H <sub>3</sub> PO <sub>4</sub><br>20 mM NaOH + 5 mM H <sub>3</sub> PO <sub>4</sub>   | 0.912                 | Cathodic | Cathodic               |
| 28 | Fig. 9 in Ref. [91]          | 10 mM H <sub>3</sub> PO <sub>4</sub><br>20 mM NaOH + 5 mM HCl                              | 0.449                 | Cathodic | Cathodic               |
| 29 | Fig. 10 in Ref. [91]         | 10 mM H <sub>3</sub> PO <sub>4</sub><br>20mM NaOH+10mM formic acid                         | 0.746                 | Cathodic | Cathodic               |
| 30 | Fig. 10 in ref. [91]         | 10 mM H <sub>3</sub> PO <sub>4</sub><br>20 mM NaOH+10 mM H <sub>3</sub> PO <sub>4</sub>    | 343.6                 | Cathodic | Cathodic               |
| 31 | Fig. 10 in Ref. [91]         | 10 mM H <sub>3</sub> PO <sub>4</sub><br>20 mM NaOH+10 mM HCl                               | 0.866                 | Cathodic | Cathodic               |
| 32 | Ref. [92]                    | 100 mM H <sub>3</sub> PO <sub>4</sub><br>40 mM NaOH                                        | 0.218                 | Cathodic | Cathodic <sup>c)</sup> |
| 33 | Ref. [93]                    | 10 mM H <sub>3</sub> PO <sub>4</sub><br>20 mM NaOH                                         | 0.237                 | Cathodic | Cathodic <sup>c)</sup> |

a) The computation of  $R_f$  value is the same as that in Table 3.

b) EA = Ethanolamine.

c) Results of computer simulations.
